# Supplementary material for: Depicting Risperidone Safety Profiles in Clinical Trials Across Different Diagnoses Using a Dopamine D2-Based Pharmacological Class Effect Query Defined by FAERS
Source: Springer Nature journal article supplement (doi:10.1007/s40261-022-01218-7), 2022-11-09

**Journal:** Clinical Drug Investigation

**Article Title:** Depicting risperidone safety profiles in clinical trials across different diagnoses using a dopamine D2-based pharmacological class-effect query defined by FAERS

**Authors:** Seth C. Hopkins, Ajay Ogirala, Courtney Zeni, MaryAlice Worden, Kenneth S Koblan

**Affiliation:** Sunovion Pharmaceuticals Inc., Marlborough, MA, USA

FIGURE 1 [36]

Preferred Terms (PT) of Adverse Events observed in clinical studies, according to EBGM values of PT observed in FAERS

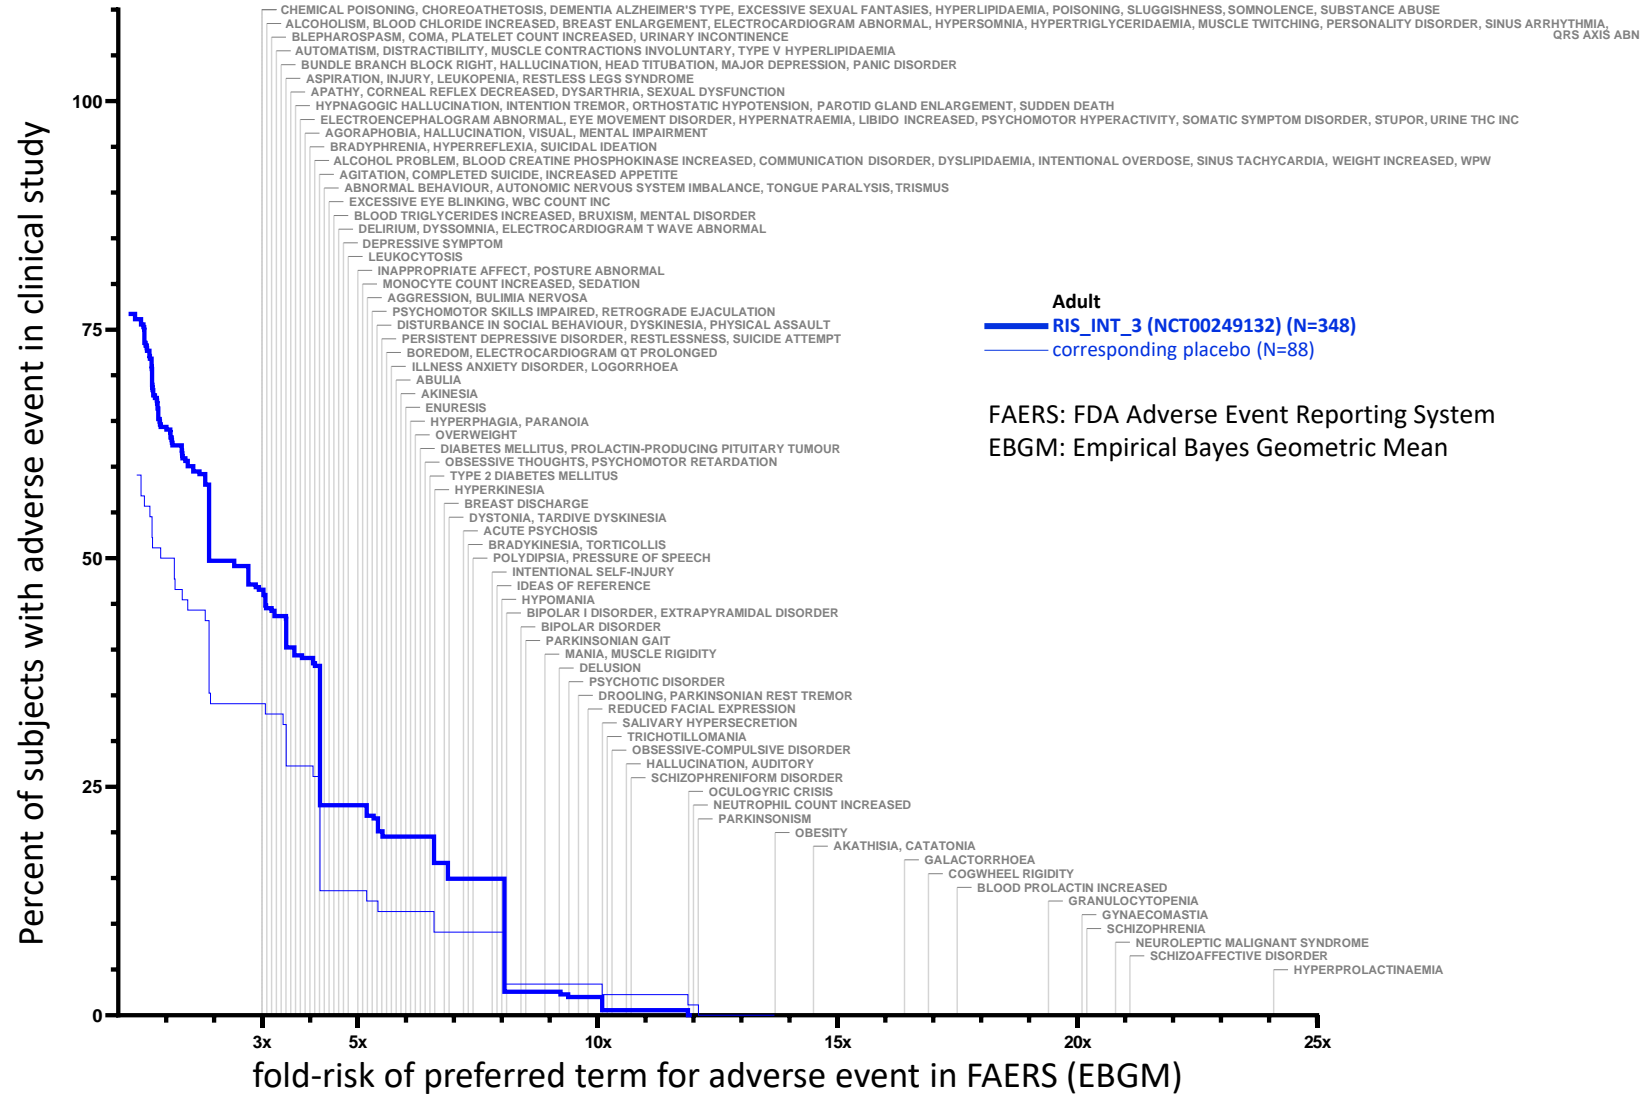

FIGURE 2 [41]

Preferred Terms (PT) of Adverse Events observed in clinical studies, according to EBGM values of PT observed in FAERS

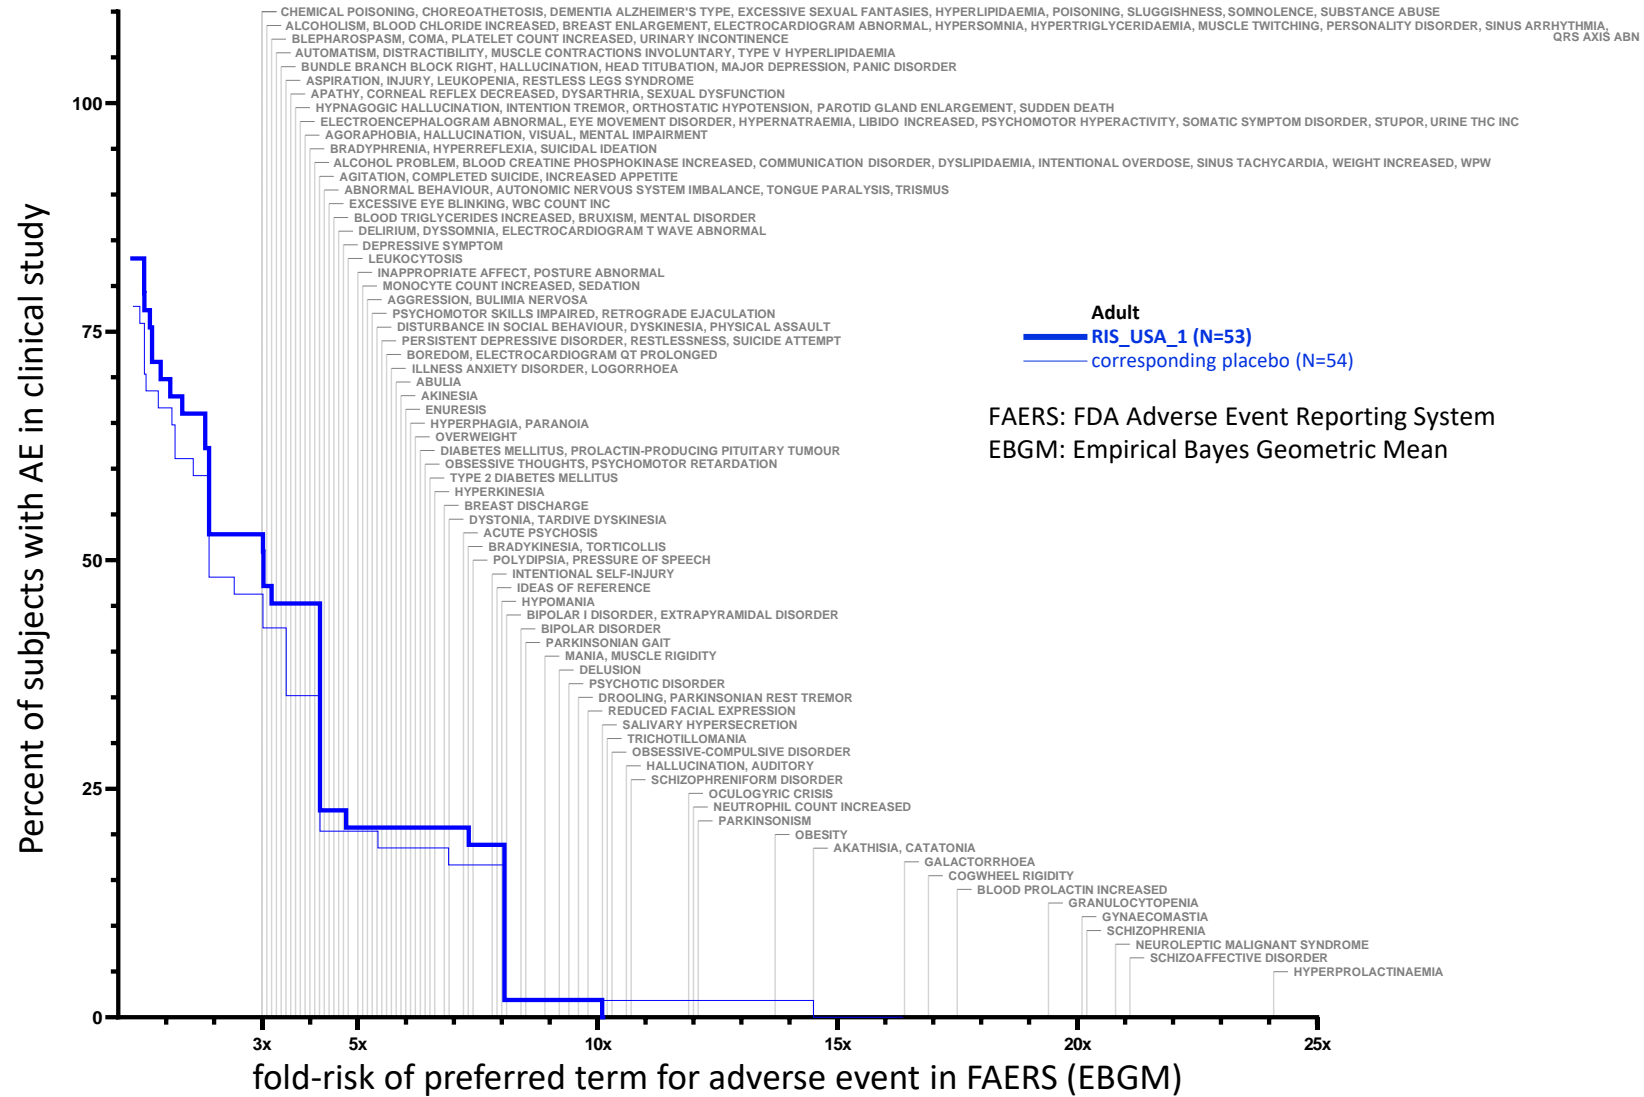

FIGURE 3 [42]

Preferred Terms (PT) of Adverse Events observed in clinical studies, according to EBGM values of PT observed in FAERS

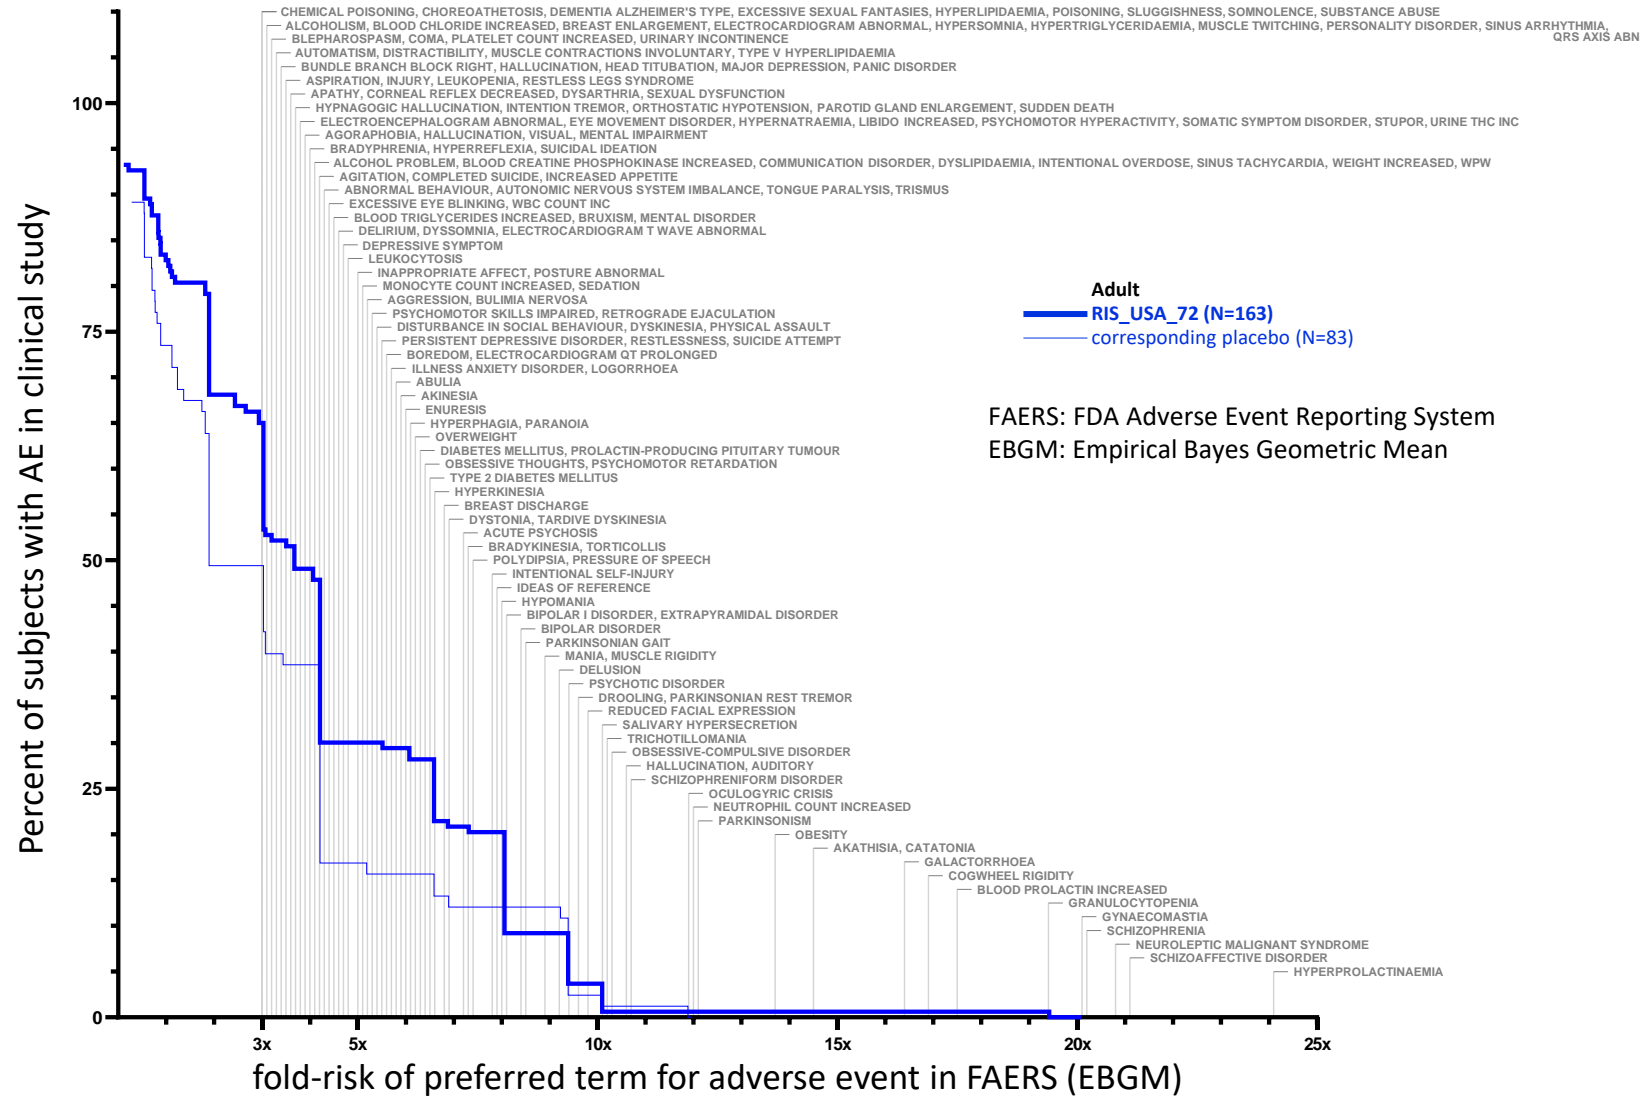

FIGURE 4 [37]

Preferred Terms (PT) of Adverse Events observed in clinical studies, according to EBGM values of PT observed in FAERS

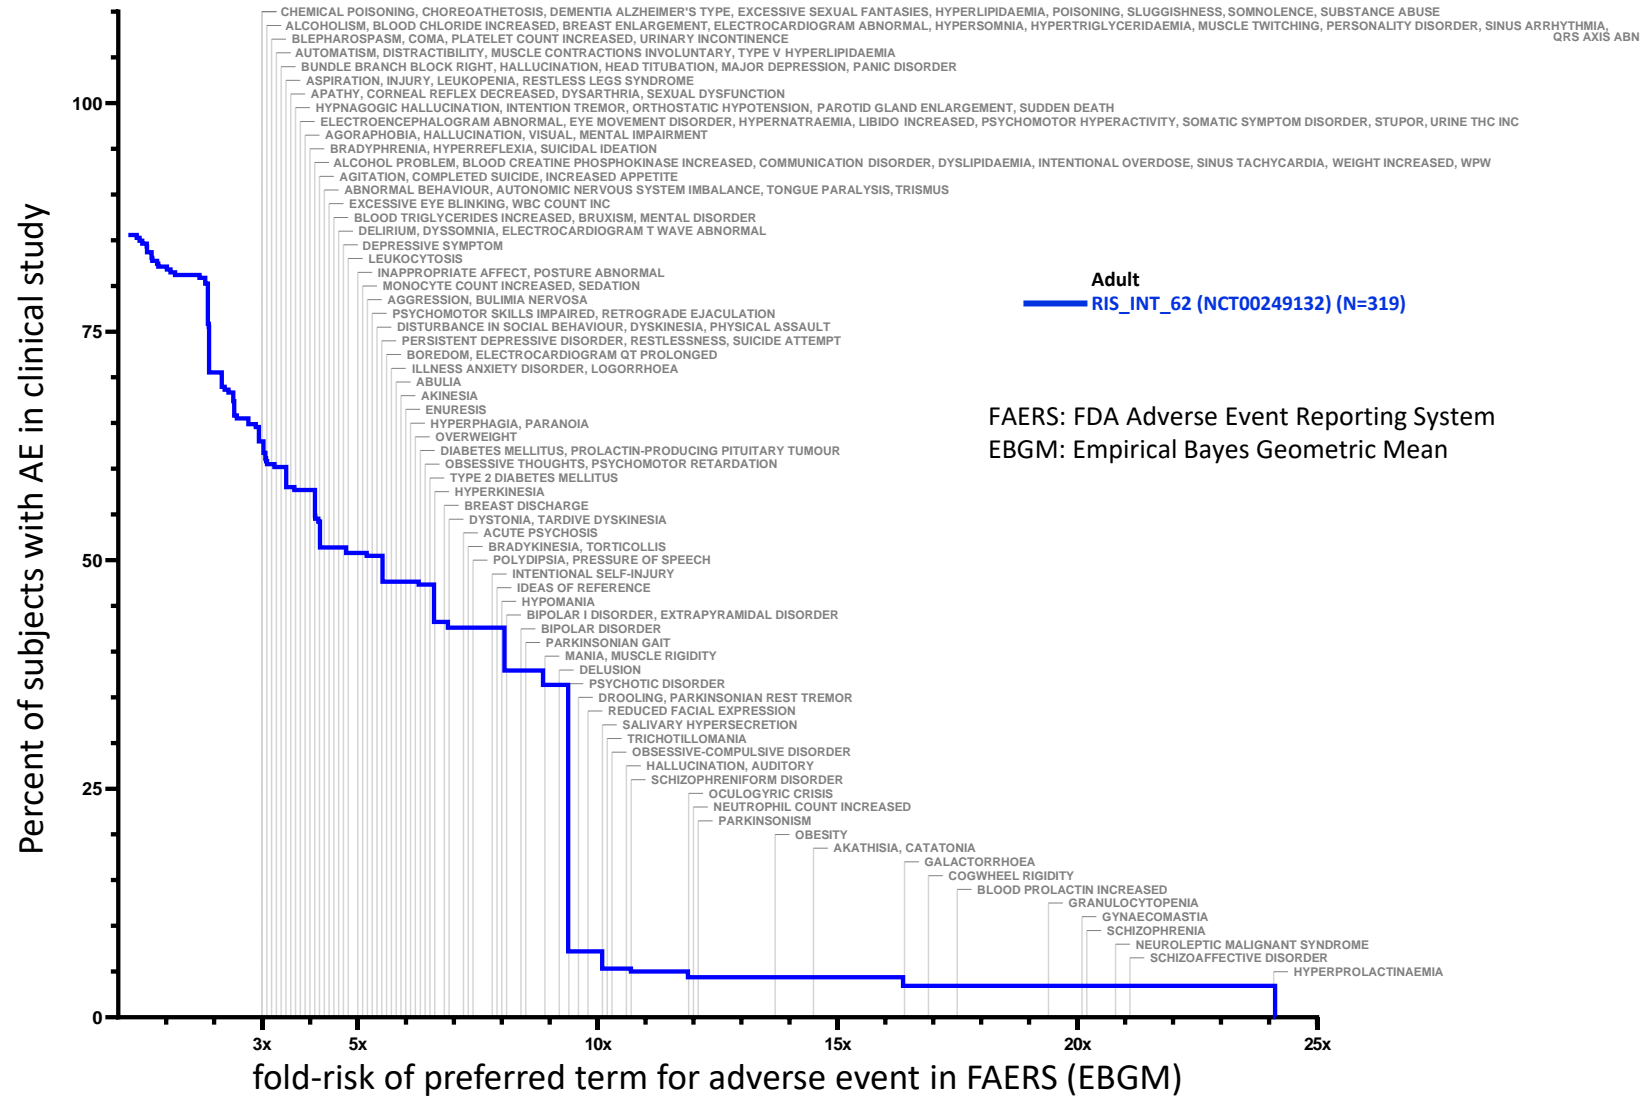

FIGURE 5 [38]

Preferred Terms (PT) of Adverse Events observed in clinical studies, according to EBGM values of PT observed in FAERS

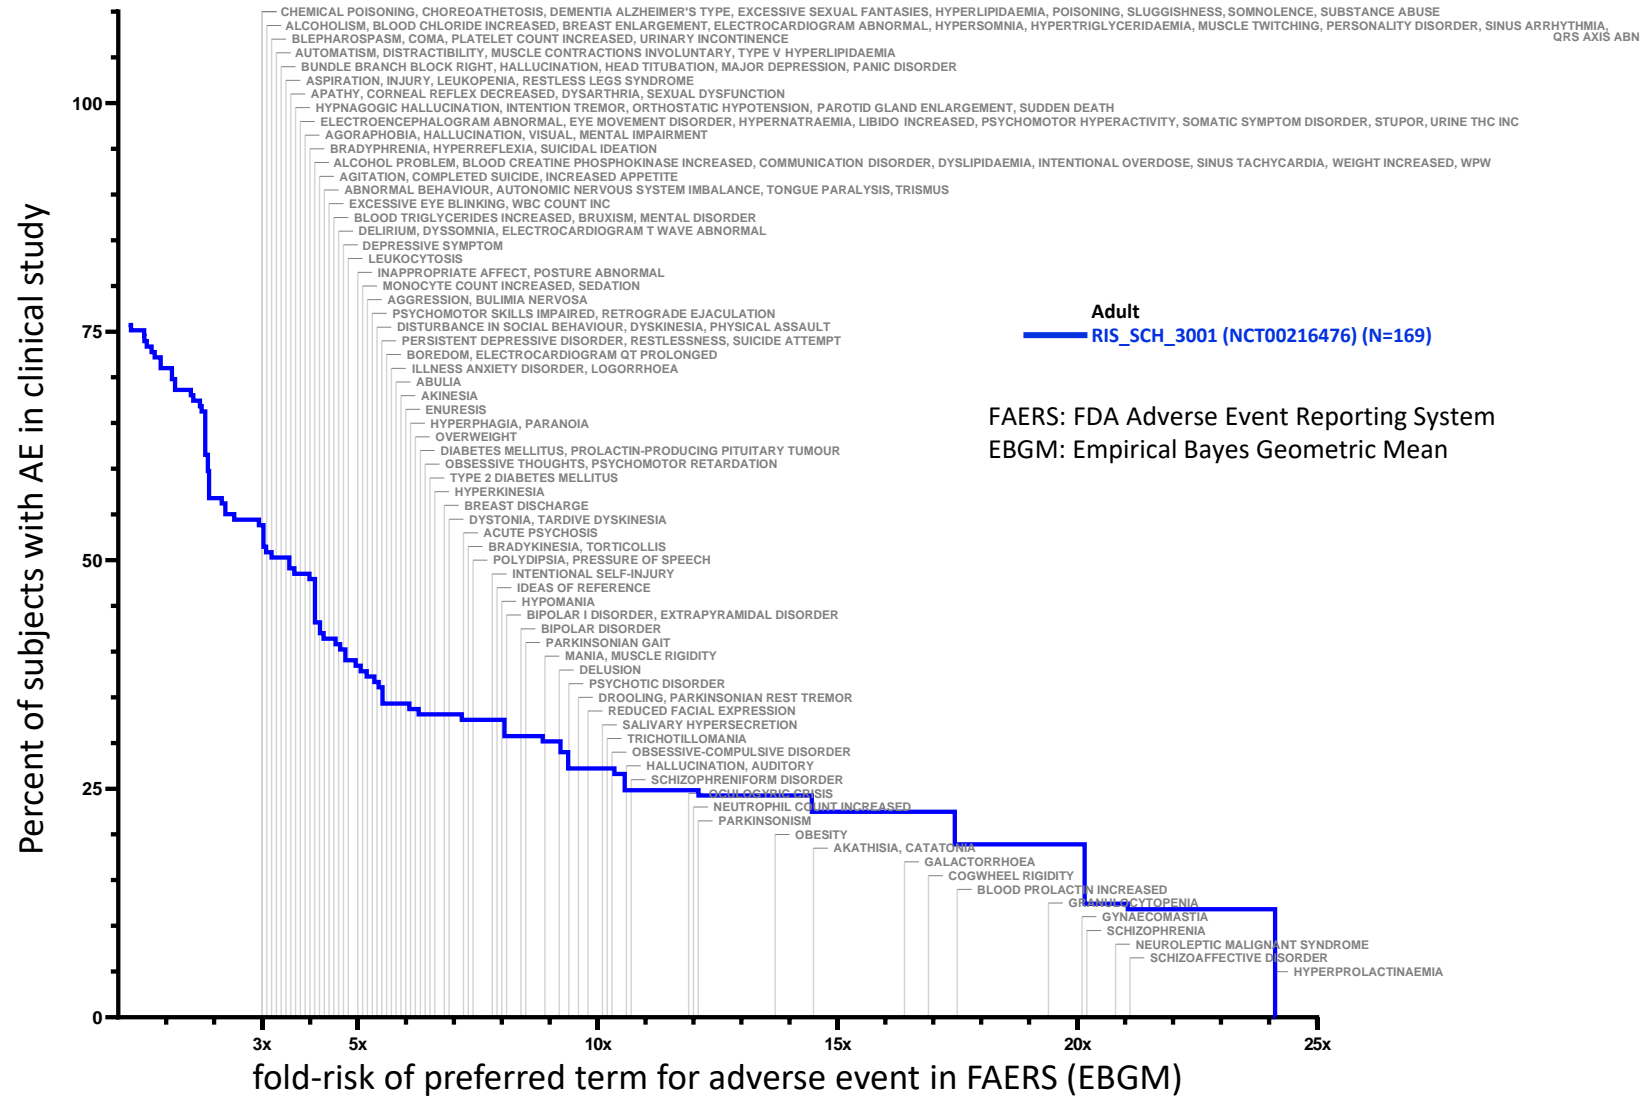

FIGURE 6 [39]

Preferred Terms (PT) of Adverse Events observed in clinical studies, according to EBGM values of PT observed in FAERS

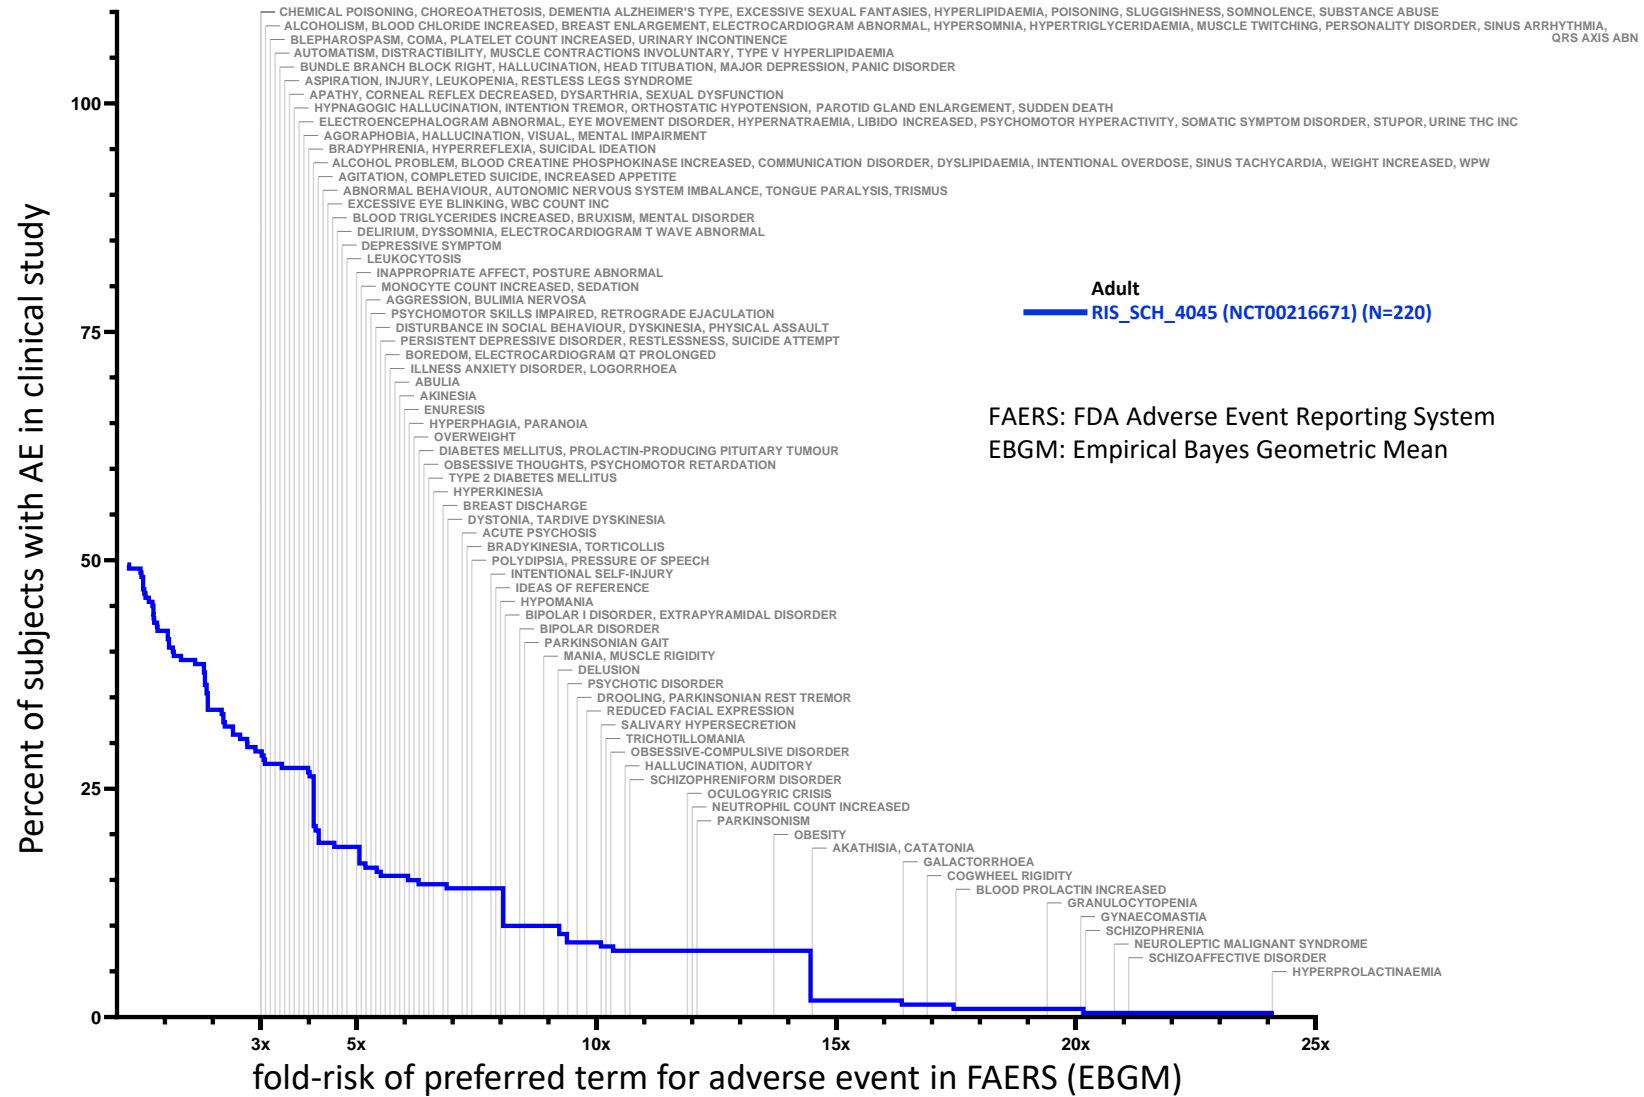

FIGURE 7 [40]

Preferred Terms (PT) of Adverse Events observed in clinical studies, according to EBGM values of PT observed in FAERS

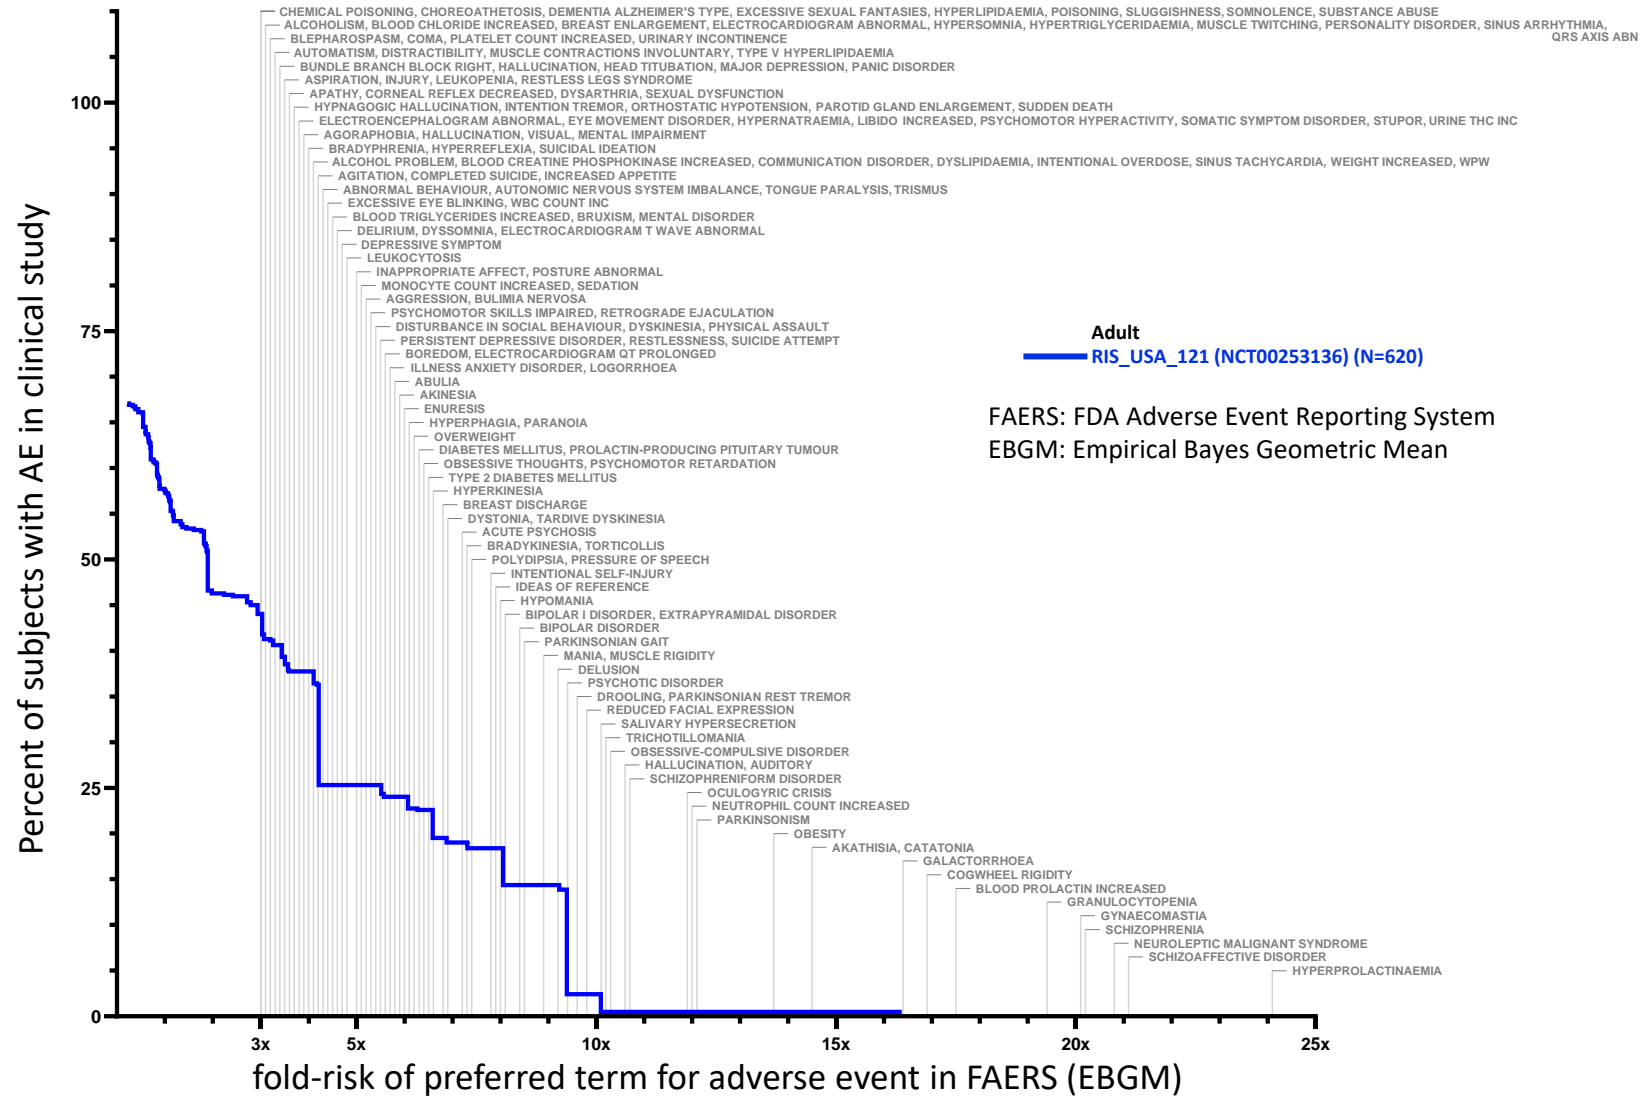



FIGURE 8 [28,29]

Preferred Terms (PT) of Adverse Events observed in clinical studies, according to EBGM values of PT observed in FAERS

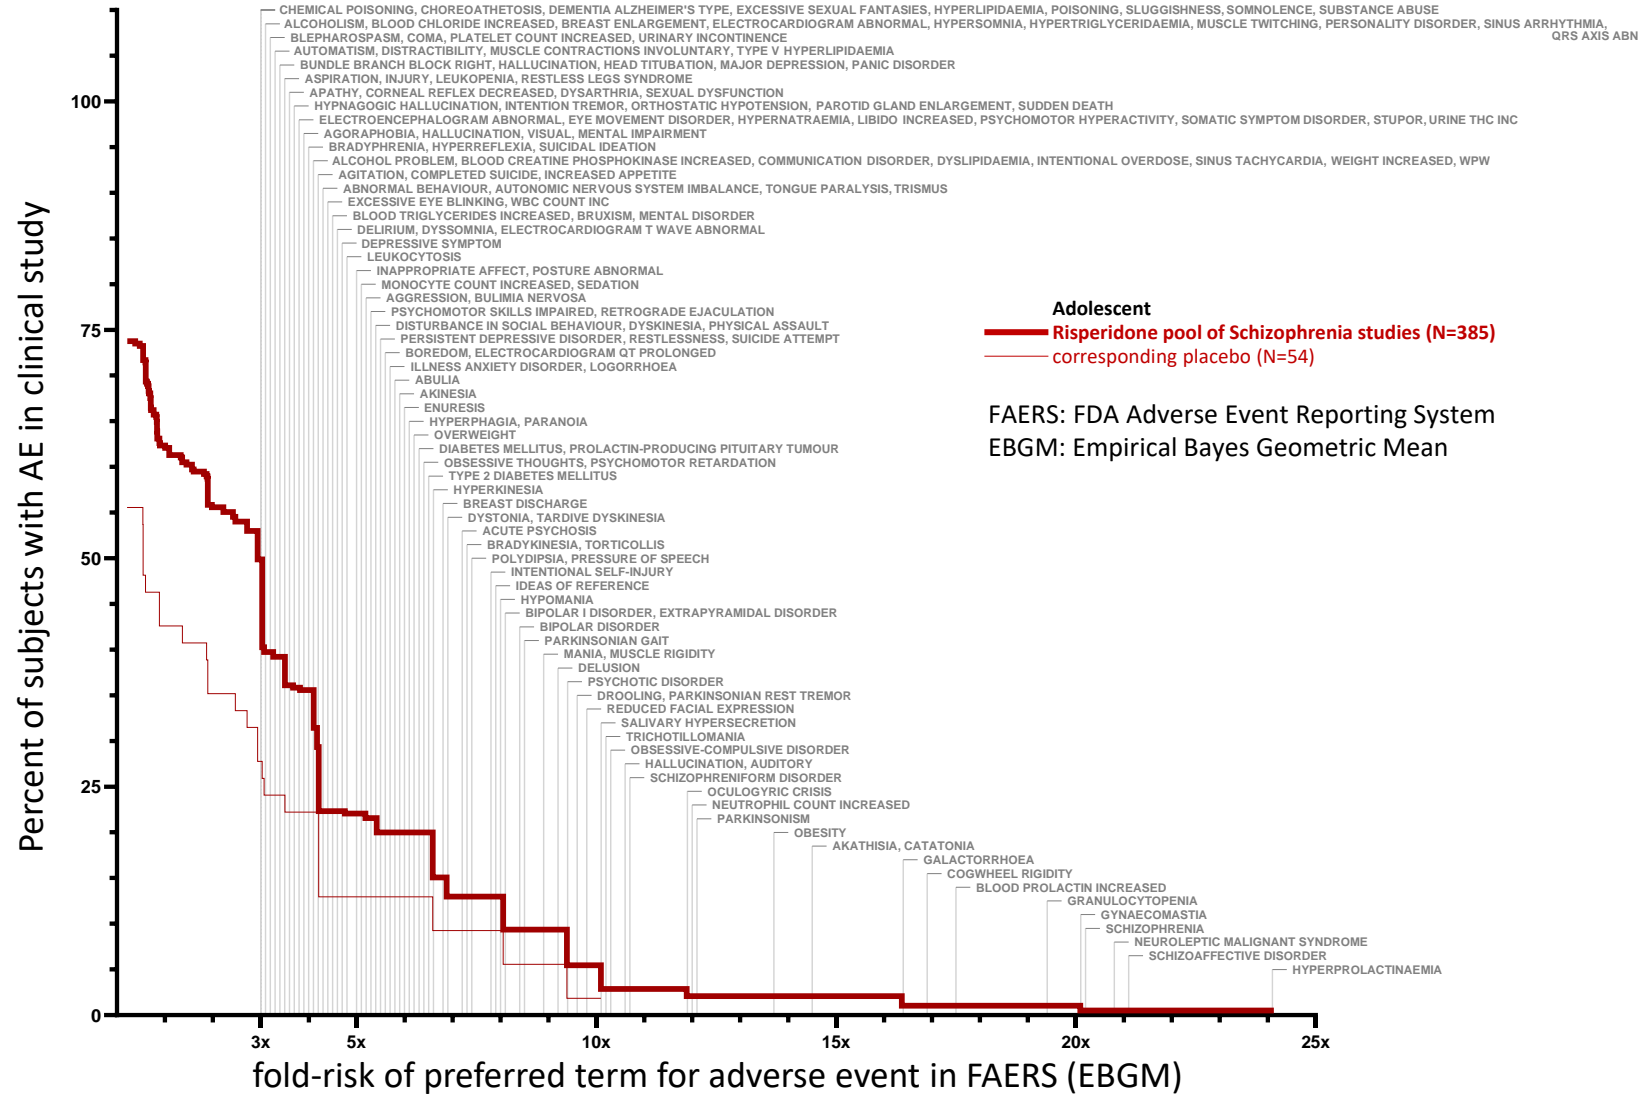

FIGURE 9 [32-35]

Preferred Terms (PT) of Adverse Events observed in clinical studies, according to EBGM values of PT observed in FAERS

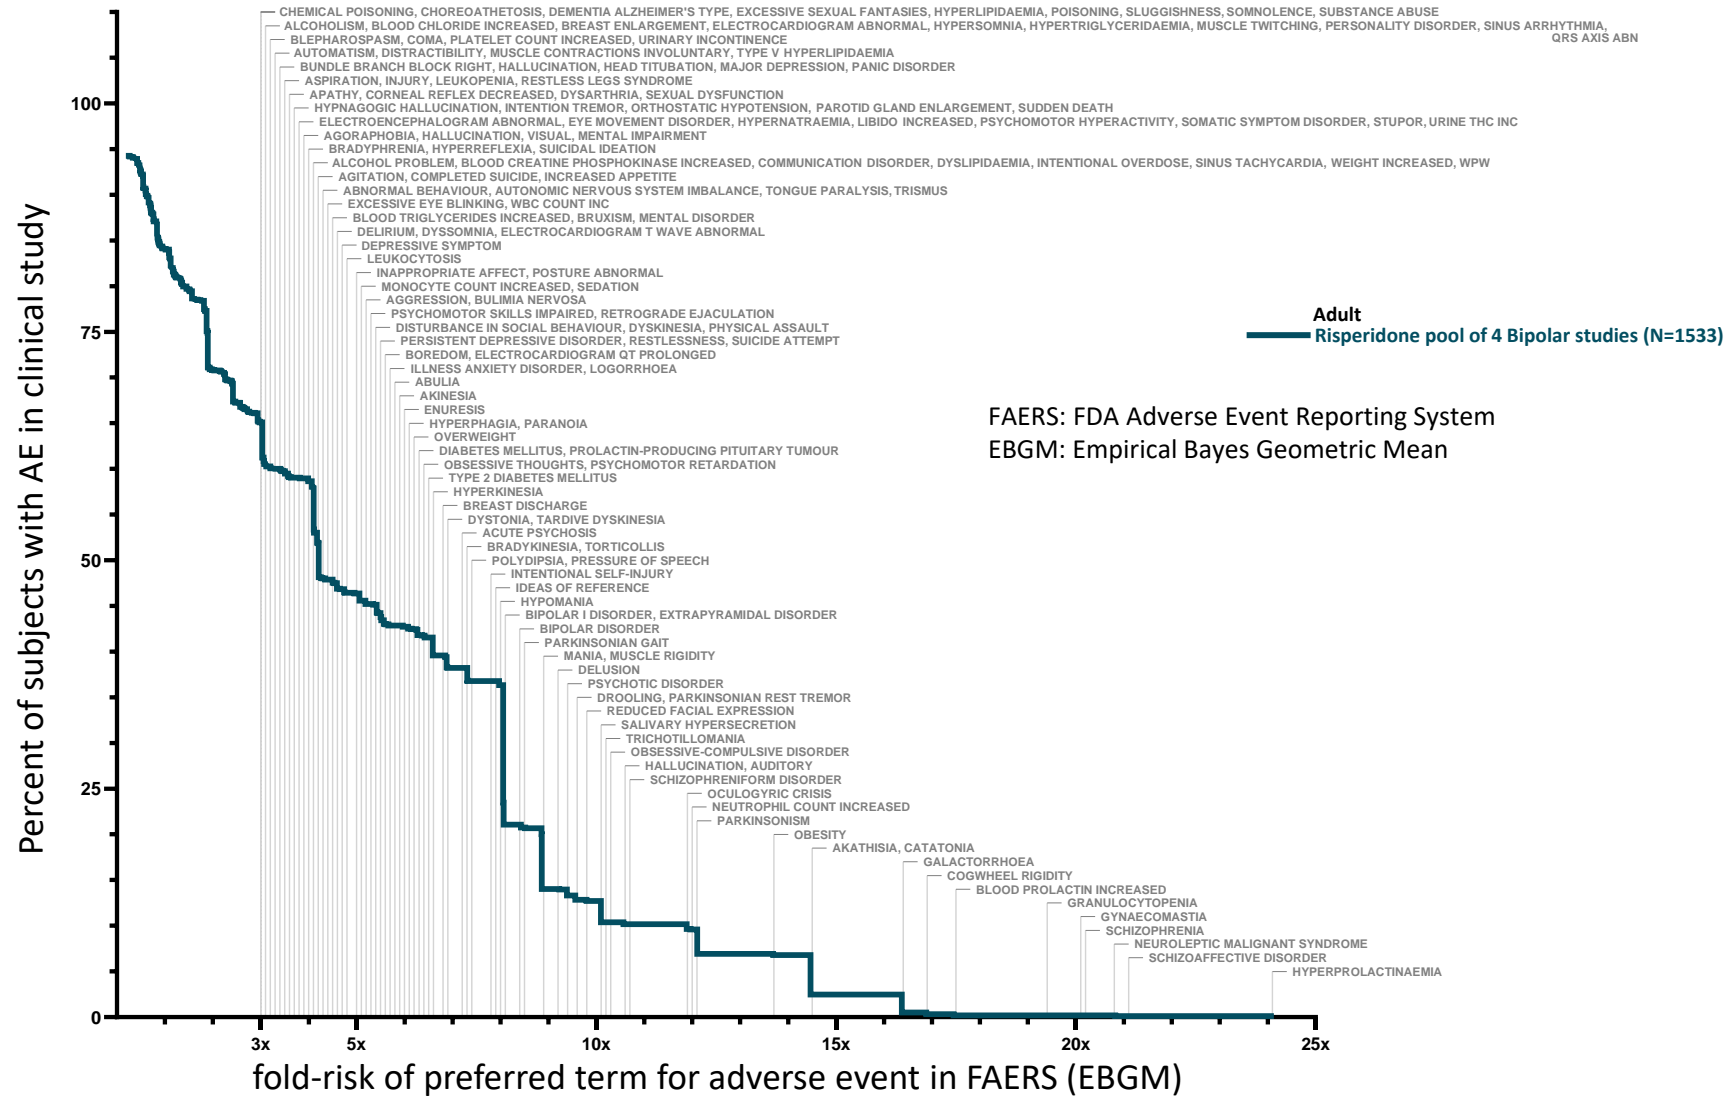

FIGURE 10 [30,31]

Preferred Terms (PT) of Adverse Events observed in clinical studies, according to EBGM values of PT observed in FAERS

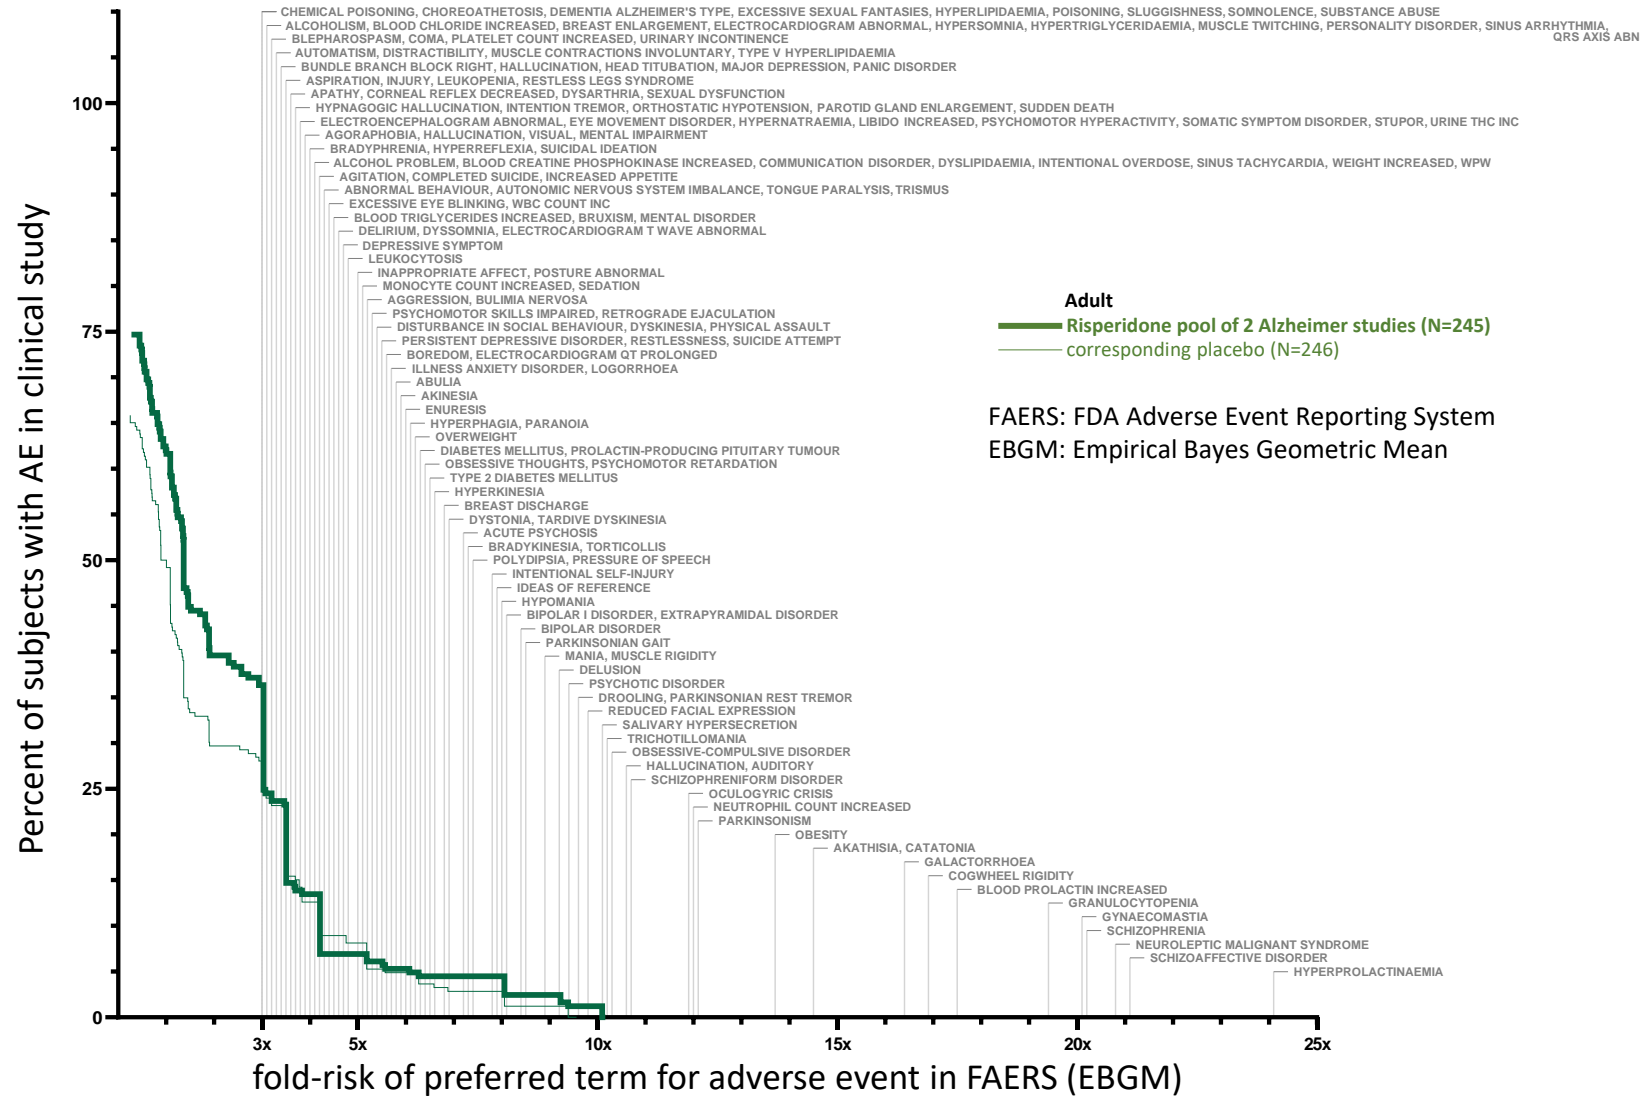

FIGURE 11 [27]

Preferred Terms (PT) of Adverse Events observed in clinical studies, according to EBGM values of PT observed in FAERS

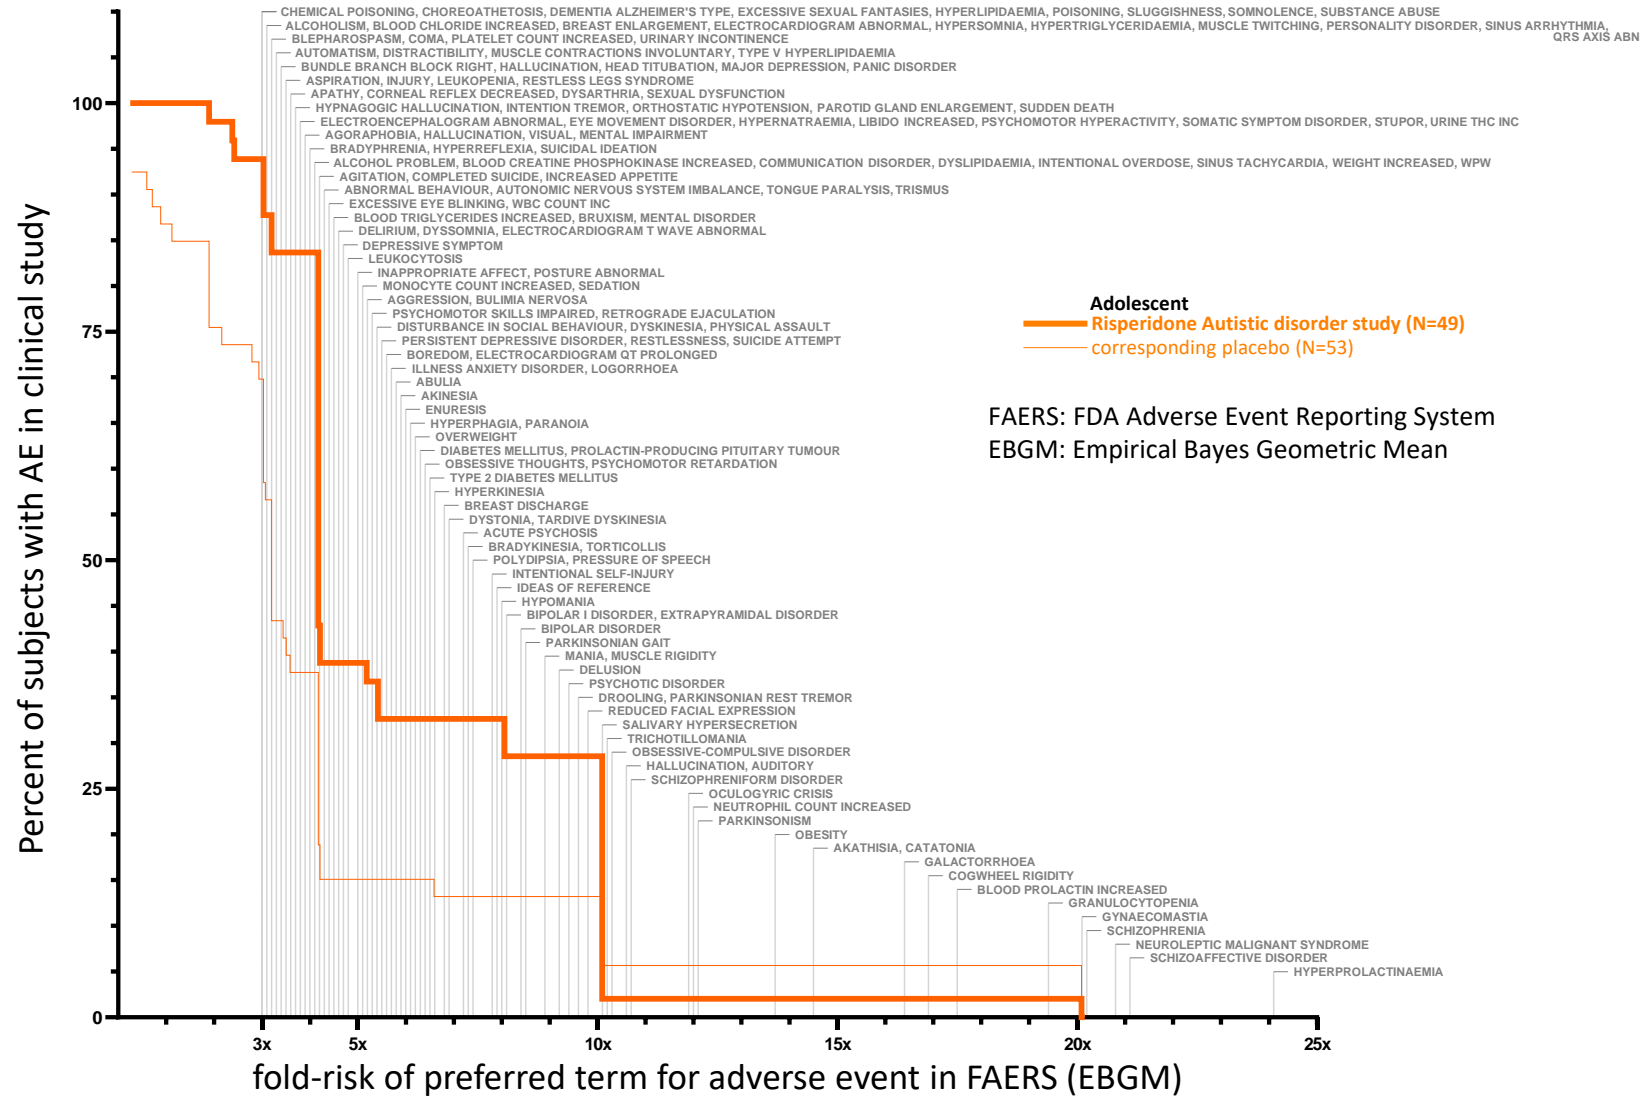

Supplement: MOESM1 [file 24114406]
